# 1 **Prevalence of differences of sex development in Switzerland from 2000-2019**

2 Sara Metzger<sup>1</sup>, Grit Sommer<sup>1,2,3\*#</sup>, Christa E. Flück<sup>1,2\*</sup>, on behalf of the Swiss DSD Cohort Study

3 Group

4 \*co-last authors

5

6 <sup>1</sup> Division of Pediatric Endocrinology, Diabetology and Metabolism, Department of Pediatrics,

7 Inselspital, Bern University Hospital, University of Bern, Switzerland

8 <sup>2</sup> Department of Biomedical Research, University of Bern, Switzerland

9 <sup>3</sup> Institute of Social and Preventive Medicine, University of Bern, Switzerland

10

11 Members of the Swiss DSD Cohort Study Group in alphabetical order: Christine Aebi-Ochsner,

12 Private Practice for Paediatric Endocrinology, Biel Switzerland; Kanetee Busiah, Department of

13 Pediatric Endocrinology and Diabetology, CHUV, University Children's Hospital, Lausanne,

14 Switzerland; Mirjam Dirlwanger, Pediatric Endocrine and Diabetes Unit, Children's University

15 Hospital Geneva, Geneva, Switzerland; Sylvia Gschwend, Private Practice for Paediatric

16 Endocrinology, Zug, Switzerland; Melanie Hess, Pediatric Endocrinology and Diabetology,

17 University Children's Hospital Basel, Basel, Switzerland; Beatrice Kuhlmann, Pediatric

18 Endocrinology, Cantonal Hospital Aarau, Aarau, Switzerland and Private Practice for Paediatric

19 Endocrinology, Basel, Switzerland; Dagmar l'Allemand, Department of Endocrinology,

20 Children's Hospital of Eastern Switzerland, St. Gallen, Switzerland; Mariarosaria Lang,

21 Paediatric Endocrinology and Diabetology, University Children's Hospital Zurich, Zurich,

22 Switzerland; Kees Noordam, Centre for Paediatric Endocrinology Zurich (PEZZ), Zurich,

23 Switzerland; Franziska Phan-Hug, Department of Pediatrics, Hospital Morges, Morges and

24 Department of Pediatrics, Hospital Wallis, Sion, Switzerland; Ursina Probst, Department of

25 Pediatrics, Cantonal Hospital Winterthur, Winterthur, Switzerland; Maristella Santi, Department

26 of Pediatrics, Cantonal Hospital Lucerne, Lucerne, Switzerland; Silvia Schmid, Private Practice

27 for Paediatric Endocrinology, Dubendorf, Switzerland; Valérie Schwitzgebel, Pediatric Endocrine  
28 and Diabetes Unit, Children's University Hospital Geneva, Geneva, Switzerland; Michael  
29 Steigert, Department of Pediatrics, Cantonal Hospital Graubunden, Chur, Switzerland; Gabor  
30 Szinnai, Pediatric Endocrinology and Diabetology, University Children's Hospital Basel, Basel,  
31 Switzerland; Gerald Theintz, Private Practice for Paediatric Endocrinology, Lausanne,  
32 Switzerland.

33

34 **#Correspondence:**

35 Grit Sommer

36 Institute of Social and Preventive Medicine

37 Mittelstrasse 43

38 3012 Bern, Switzerland

39 Phone: +4131 684 33 47

40 Email: [gritti.sommer@unibe.ch](mailto:gritti.sommer@unibe.ch)

41

42 ORCID:

43 Christa Flück 0000-0002-4568-5504

44 Grit Sommer 0000-0002-4205-7932

45

46 *Key words:* DSD; intersex; sex chromosome DSD; 46,XY DSD; 46,XX DSD; CAH; gonadal  
47 development

48 *Disclosure:* The authors declare no conflict of interest.

49 **Abstract** (249/250)

50 **Objective:** Reliable data on prevalence of rare differences of sex development (DSD) are  
51 lacking. We aimed to estimate population-based prevalence of DSD in Switzerland.

52 **Design:** Retrospective population-based study including individuals with DSD according to  
53 Chicago Consensus, born in Switzerland from 2000-2019.

54 **Methods:** Endocrine care centers in all ten Swiss Children's Hospitals and eight private  
55 endocrine practices collected DSD data through the I-DSD registry or case report forms. We  
56 calculated prevalence for DSD diagnostic groups and analyzed time trends in prevalence.

57 **Results:** Over the 20-year study period, we identified 561 individuals with DSD. Almost half  
58 (n=266, 47%) had sex chromosome DSD, 177 (32%) had 46,XY DSD and 118 (21%) had 46,  
59 XX DSD. Causes for 46,XY DSD were disturbed androgen synthesis or action (37/177, 21%),  
60 atypical gonadal development (28/177, 16%), or other causes (112/177, 63%). Causes for  
61 46,XX DSD were androgen excess (99/118, 84%), atypical gonadal development (8/118, 7%),  
62 or other causes (11/118, 9%). On average, 28 new cases were born with DSD annually.  
63 Prevalence was 17 for sex chromosome DSD, 12 for 46,XY DSD and 8 for 46,XX DSD per  
64 100'000 live births and year. One per 7,500 newborn girls had 46,XX congenital adrenal  
65 hypoplasia (CAH).

66 **Conclusion:** Prevalence of sex chromosome DSD was lower than expected because of  
67 underreporting due to late diagnosis. Prevalence of 46,XX CAH is similar to newborn screening  
68 data, suggesting good completeness of cases. For complex DSD cases, we expect complete  
69 coverage. This study provides a valuable resource for policymaking and (inter)national research  
70 on DSD.

## 71 INTRODUCTION

72 Differences of sex development (DSD) is an umbrella term that stands for a heterogeneous  
73 group of rare conditions that affect human sex development and maturation (1). The term DSD  
74 has first been introduced with the Chicago Consensus Statement in 2006 that defined DSD as  
75 "congenital conditions in which the development of chromosomal, gonadal, anatomic sex is  
76 atypical" (2). Most DSDs are congenital due to their genetic origins. However, many individuals  
77 never receive a genetic diagnosis but are diagnosed as DSD based on their phenotype (3).  
78 Although this consensus around terminology has been widely accepted by medical  
79 professionals, it remains controversial (4), and other terms have been suggested including  
80 intersex, variations of sex development or more recently variations of sex characteristics. New  
81 knowledge on human sex development and the introduction of a classification based on  
82 genetics clarified the perspective on this broad and complex subject. A clear definition allowed  
83 researchers and physicians to identify and work together with persons with DSD and improve  
84 efforts towards well-integrated, progressive, patient-centered care and research across the DSD  
85 spectrum. The I-DSD Registry is an international database for DSD that allows for standardized  
86 and pseudonymized data collection (5). It is a valuable tool for researchers and physicians to  
87 record and obtain data of individuals with DSD to solve clinical and translational research  
88 questions (5, 6). As of June 2023, this registry included data of 7749 individuals with DSD  
89 originating from 135 centers of 45 countries world-wide (7). It has formed the basis of over 65  
90 research projects addressing various topics of DSD such as mechanisms of disease of specific  
91 subtypes of DSD, genetic and diagnostic approaches, treatment options, long-term outcomes,  
92 quality of care and psychosocial topics.

93 Recent developments have shifted perceptions and approaches toward DSD, yet many open  
94 research questions remain to improve care for individuals with DSD (1, 8, 9, 10). Provision of  
95 optimal healthcare for individuals with DSD and perception by policymakers, ethical and legal  
96 bodies as well as society require a clear understanding of the occurrence of these conditions.

97 However, the accurate incidence and prevalence of DSD are still unknown (11). One exception  
98 are studies reporting incidences of congenital adrenal hyperplasia (CAH), because CAH is  
99 included in national neonatal screening programs (12). Only few studies estimated incidence or  
100 prevalence for other types of DSD, but these studies were either old, dating from 1955 to 2000  
101 (13), or covered only single centers or regions and thus yielded variable results (14) (15, 16, 17,  
102 18, 19, 20, 21, 22, 23). To date, no country has a nation-wide registration system for DSD.  
103 Our study is the first to assess prevalence of DSD in a population-based cohort study. We  
104 aimed to calculate prevalence and trends in prevalence of DSD diagnostic groups according to  
105 the Chicago Consensus Classification during the 20-year period from 2000-2019 in Switzerland.

106

## 107 **MATERIAL AND METHODS**

### 108 **Ethics, Study Design and Participants**

109 For this population-based retrospective observational study cohort, we retrospectively identified  
110 patients with DSD in 19 different Swiss centers of pediatric endocrinology.

111 We included all individuals with DSD as defined by the Chicago Consensus Classification (2),  
112 who were born in Switzerland between January 1, 2000 and December 31, 2019. Individuals  
113 with DSD were mainly followed by a specialized interdisciplinary team (4) at outpatient clinics of  
114 pediatric hospitals under the lead of a pediatric endocrinologist. We approached all 11  
115 departments of pediatric endocrinology in Swiss Children's hospitals to collaborate for data  
116 collection, and 10 out of 11 participated covering the whole of Switzerland except the canton of  
117 Ticino. We also asked all Swiss pediatric endocrinologists in private practices to report their  
118 patients, and 8 followed our call.

119 The Ethics Committee of the Canton of Bern granted ethical approval to the Swiss DSD Cohort  
120 Study under BASEC ID 2016-01210. With ethical approval, we were able to collect a core data  
121 set without informed consent of participants.

122

## 123 **Data Collection**

124 Participating centers identified eligible patients through patient lists of treating physicians and  
125 searches in their administrative clinical databases or hospital coding systems. Physicians  
126 extracted data from medical records and filled them into the basic registration module of the I-  
127 DSD Registry (<https://sdmregistries.org/>). Centers without access to the registry used a case  
128 report form identical to the variables in the I-DSD Registry. Extracted data included treatment  
129 center, year of birth, assigned sex at birth, country of birth, karyotype, details of DSD condition  
130 including genetic analyses and current gender. We coded each individual according to the  
131 diagnostic categories suggested from the Chicago Consensus Classification (2) into three DSD  
132 main groups (sex chromosome DSD, 46,XY DSD, 46,XX DSD) and diagnostic subgroups (sex  
133 chromosome DSD: Klinefelter syndrome and variant, Turner syndrome and variants,  
134 45,X/46,XY and variants, other; 46,XY DSD: disorders of gonadal development, disorders in  
135 androgen synthesis or action, other; 46,XY DSD: disorders of gonadal development, androgen  
136 excess, other). We clarified missing or inconclusive data with the collaborating physicians.  
137 Population-based data on live births came from the Swiss Federal Office of Statistics (SFSO).  
138 Numbers of cases of CAH identified by newborn screening came from the Swiss Neonatal  
139 Screening laboratory (<https://www.neoscreening.ch/de/>).

140 To ensure that our cohort did not include duplicate entries of the same individuals with DSD, an  
141 independent institution performed record linkage based on first and last name and date of birth.

142

## 143 **Data Analysis and Statistics**

144 We calculated prevalence based on the day the individuals were born, assuming that any DSD  
145 regardless of the timing of clinical presentation, is already present at birth, similarly to a Danish  
146 study on CAH (24). We calculated prevalence based on population data from the Swiss Federal  
147 Statistical Office (SFSO). We calculated the average number of cases born with DSD per year  
148 for main DSD categories and specific DSD subgroups during the entire observation period from

149 2000-2019 and for four 5-year intervals (2000-2004, 2005-2009, 2010-2014, 2015-2019). We  
150 calculated prevalence of DSD expressed per 100'000 liveborn individuals per year. Depending  
151 on the diagnosis, we calculated prevalence based on all newborns, or only newborn boys or  
152 newborn girls. For all DSDs combined, for the main DSD categories (sex chromosome DSD,  
153 46,XY DSD, 46,XX DSD), and for two sex chromosome DSD subgroups (45,X/46,XY and  
154 variants, other sex chromosome DSD) we used the number of all newborns. For Klinefelter  
155 syndrome and variants and the 46,XY DSD subgroups (disorders of gonadal development,  
156 disorders in androgen synthesis or action, other 46,XY DSD) we used newborn boys. For  
157 Turner syndrome and variants and the 46,XX DSD subgroups (disorders of gonadal  
158 development, androgen excess, other 46,XX DSD) we used newborn girls. We calculated  
159 confidence intervals for prevalence using the Poisson distribution (25). We used Stata, Version  
160 16.1 for data preparation and descriptive statistics, and R statistic management, R Version 4.2.2  
161 for prevalence calculations.

162 To examine trends in prevalence expressed as annual percentage changes (APC), we used  
163 JoinPoint, Version 4.0.2.2. JoinPoint is a statistical package originally developed by the US  
164 National Cancer Institute to describe trends in cancer incidence and mortality (26). JoinPoint  
165 fitted regression lines through the selected data, with the natural logarithm of proportion  
166 (prevalence) as dependent variable and calendar year (2000-2019) as independent variable.  
167 We allowed for a maximum number of 0 joinpoints to capture overarching trends within the data.

168

## 169 **RESULTS**

170 A total of 685 individuals with DSD born between 2000 and 2019 were treated in the 10  
171 pediatric hospitals including all University Children's Hospitals in Switzerland and the 8 private  
172 pediatric practices. We excluded duplicate individuals (n=56) and individuals born outside of  
173 Switzerland or in the canton Ticino (n=66), leading to a final cohort of 561 individuals with DSD  
174 **(Figure 1)**.

175

176 We classified our cohort of 561 individuals into the three main DSD categories according to the  
177 Chicago Consensus Classification (2). A total of 266 (47%) individuals had sex chromosome  
178 DSD, 177 (32%) 46,XY DSD and 118 (21%) 46,XX DSD. **Table 1** gives an overview of the  
179 specific diagnoses comprised within these three main DSD categories.

180

### 181 *Prevalence of DSD in Switzerland*

182 Throughout the entire 20-year study period spanning from 2000 to 2019, an annual average of  
183 76'719 children were born in all Swiss cantons excluding Ticino. During the same period, we  
184 identified an average number of 28 individuals with DSD born per year (**Table 2**), resulting in an  
185 overall prevalence of 36.6 (95%CI 33.6; 39.7) per 100'000 newborns per year for all DSD  
186 diagnoses (**Table 2**).

187

188 When we stratified our study period into 5-year intervals, annual DSD prevalence per 100'000  
189 newborns was highest with 44.3 (95%CI 31.7; 51.7) between 2005-2009, and lowest with 28.2  
190 (95%CI 23.4; 33.7) in the most recent interval between 2015-2019 (Figure 2A and Supplemental  
191 Table 1). Sex chromosome DSD accounted for the largest proportion of cases among all DSD  
192 main groups between 2000-2014. Only between 2015-2019, the 46,XY DSD proportion was  
193 larger. Throughout all time intervals, the 46,XX DSD group accounted for the smallest  
194 proportion of cases.

195 Sex chromosome DSD prevalence was highest with 24.0 (95%CI 19.2; 29.7) per 100'000  
196 newborns per year between 2000-2004 (Figure 2B and Supplemental Table 1). Turner  
197 syndrome and variants accounted for the largest proportion of sex chromosome DSD  
198 (prevalence 20.0 per 100'000 newborn girls, 95%CI 16.9;23.5), followed by Klinefelter syndrome  
199 and variants (prevalence 9.4 per 100'000 newborn boys, 95%CI 7.4-11.8). Other types of sex  
200 chromosome DSD were rare (prevalence 0.5-1.7 per 100'000 newborns). Prevalence of sex



201 chromosome DSD decreased from 2000-2019 with an APC of -6.3 (95%CI -8.4; -4.1) which was  
202 mainly driven by the Klinefelter syndrome (APC -8.2, 95%CI 11.4; -4.8) and Turner syndrome  
203 group (APC -5.2, 95%CI -7.8; -2.5) (Figures 2B and 3B).

204  
205 Prevalence of 46,XY DSD was 11.5 (95%CI 9.9; 13.4) per 100'000 newborns for the entire  
206 study period and remained stable over time (APC 1.8, 95%CI -0.5; 4.1) (Table 2, Figure 3C),  
207 with a slight trend towards an increasing prevalence after 2014 (Figure 2C). Other 46,XY DSD  
208 (prevalence 14.2 per 100'000 newborn boys, 95%CI 11.7; 17.1) was highest among the group  
209 of 46,XY DSD, followed by disorders in androgen synthesis or action (prevalence 4.7 per  
210 100'000 newborn boys, 95%CI 3.3; 6.5) and disorders of gonadal development (prevalence 3.5  
211 per 100'000 newborn boys, 95%CI 2.4; 5.1) (Table 2). While prevalence of other 46,XY DSD  
212 increased over time (APC 4.5, 95%CI 1.0-8.1), prevalence of disorders of gonadal development  
213 or disorders in androgen synthesis or action remained stable (Figure 3C).

214  
215 Prevalence of 46,XX DSD was 7.7 (95%CI 6.4; 9.2) per 100'000 newborns (Table 2, Figures 2D  
216 and 3D), and remained stable over time (APC -2.3, 95%CI -5.9; 1.4) (Table 2, Figure 3D).  
217 Among 46,XX DSD, the androgen excess group had the highest prevalence with 13.3 (95%CI  
218 10.8; 16.2) per 100'000 newborn girls with stable prevalence over the study period. Other types  
219 of 46, XX DSD were rare (prevalence 1.1-1.5 per 100'000 newborn girls).

220

### 221 *Sex registration at birth*

222 In Switzerland sex registration at birth is mandatory and only the traditional categories of either  
223 male or female are officially available. We did not observe a difference in ratio of sex registration  
224 over the study period (Table 1). In our cohort of 561 individuals, 301 (54%) were registered with  
225 female sex at birth and 242 (43%) with male sex at birth. For 18 individuals, physicians reported  
226 that sex directly at birth was not assigned (3%; n=14 46,XY and n=4 46,XX), and data on official

227 sex registration at birth was not available to us. All individuals with sex chromosome DSD were  
228 registered with a female or male sex at birth. Discordance between karyotype and sex  
229 registration at birth was found in 28/177 individuals with 46,XY DSD (16%) and in 12/118  
230 individuals with 46,XX DSD (10%). A difference between registered sex at birth and gender at  
231 last follow-up was reported in 5 individuals originally registered female at birth (1%) and in 7  
232 individuals originally registered male at birth (1%) with one individual identifying as both male  
233 and female.

234

235 *Where are individuals with DSD cared for?*

236 We found that most children and adolescents with DSD in Switzerland (452/561, 80%) were  
237 seen by pediatric endocrinologists working in hospitals with a interdisciplinary DSD team (Figure  
238 4). Pediatric endocrinologists in private practice cared predominantly for children and  
239 adolescents with Turner syndrome, Klinefelter syndrome, or 46,XX androgen excess.

240

## 241 **DISCUSSION**

242 We report prevalence for different DSD diagnoses according to the Chicago Consensus  
243 Classification in a population-based cohort between 2000-2019 in Switzerland. Prevalence of  
244 DSD treated by pediatric endocrinologist was 37 per 100'000 (1:2'735) newborns including sex  
245 chromosome, 46,XY and 46,XX DSD. Overall, DSD prevalence decreased from 2000-2019,  
246 which was driven by a strong decrease in prevalence of sex chromosome DSD. Prevalence of  
247 46,XY DSD tended to increase and prevalence of 46,XX DSD to decrease over time.

248

249 Most studies on epidemiology of DSD come from single centers in different countries. These  
250 studies mostly describe prevalence of DSD (15, 18, 20, 21, 27) or atypical genitalia (16, 19, 22),  
251 and only some used the Chicago Consensus Classification. The reported prevalence at birth  
252 ranges from 1:357 when including any kind of atypical genitalia (27) to 1:6'347 when using DSD

253 diagnoses according to the Chicago Consensus Classification (21). The two existing multicenter  
254 studies from the US (17) and Scotland (23) reported numbers of children with either atypical  
255 genitalia or DSD at birth. The Scottish study registered atypical genitalia in Scotland  
256 prospectively between 2013-2019. They found that in 1 of 1'881 newborns, the treating  
257 physicians suspected a DSD and 1 of 3'318 newborns required DSD specialist consultation  
258 (23).

259 The US study by Finlayson et al (17) compared relative prevalence of DSD diagnoses within a  
260 cohort of 99 infants with atypical genitalia to other cohorts and found large differences in relative  
261 prevalence of sex chromosome, 46,XY and 46,XX DSD between cohorts. Several factors may  
262 contribute to this broad variability, including definition of diagnosis (e.g. inclusion/exclusion of  
263 cases without atypical genitalia), differences in study population (e.g. ethnicity, consanguinity),  
264 sampling (single center versus multicenter), study design (e.g. prospective, cross-sectional),  
265 age of study participants (e.g. newborns, children, all ages). Thus population-based data to  
266 obtain representative estimates of prevalence for different DSD diagnoses is crucial.

267

### 268 *Sex chromosome DSD*

269 We calculated prevalence of DSD based on live birth rates in Switzerland. Our overall  
270 prevalences are lower than published data for sex chromosome DSD (28, 29). Turner syndrome  
271 occurs in 25-50 individuals per 100'000 females (28, 30). We found a prevalence of 24-29 per  
272 100'000 newborn girls for Turner syndrome and variants during 2000-2009, which decreased to  
273 9 per 100'000 during 2015-2019. This decrease in prevalence over time is due to the fact that  
274 less than one third of individuals with Turner syndrome are diagnosed in childhood or  
275 adolescence (28, 30). The reported prevalence for Klinefelter syndrome varies from 40-250 per  
276 100'000 males with the main proportion only diagnosed in adulthood (31, 32). For Klinefelter  
277 and variants we found a prevalence of 18 per 100'000 newborn boys during 2000-2004 that  
278 decreased to 5 per 100'000 during 2015-2009. Our cohort included individuals with DSD who

279 were born from 2000-2019, thus a large proportion of individuals were too young to have  
280 received a Turner syndrome or Klinefelter syndrome diagnosis. Cohort studies with systematic  
281 screening or longer observation periods are needed to capture real prevalence estimates for  
282 individuals with Turner and Klinefelter syndrome. Some individuals with Turner or Klinefelter  
283 syndrome may not have required pediatric endocrine care and thus were missed by our cohort  
284 study.

285

### 286 *Non-chromosomal DSD*

287 We assume almost complete coverage of rare and complex subgroups of non-chromosomal  
288 DSD with atypical genitalia. These individuals are often diagnosed at birth and require extensive  
289 diagnostic assessments which leads to treatment by specialized DSD teams. Specialized DSD  
290 physicians reported all their DSD cases to our study cohort, reducing the likelihood of missing  
291 eligible individuals. Comparable prevalence data is scarce for individuals with complex forms of  
292 DSD.

293

294 46,XY DSD comprise disorders of gonadal development, disorders in androgen synthesis or  
295 action, and other forms. A Swedish study (33) found a prevalence of 6.4 per 100'000 live born  
296 females for individuals with a 46,XY karyotype and a female phenotype. These figures are hard  
297 to compare to our results, because we calculated prevalence based on newborn boys and did  
298 not include data on phenotype. We observed a prevalence of 3.5 per 100'000 newborn boys for  
299 individuals with disorders of gonadal development and of 4.7 for individuals with androgen  
300 synthesis or action. The largest group among the 46,XY DSD was the heterogeneous group of  
301 other 46,XY DSD including complex genital and cloacal anomalies. Often individuals of this  
302 group are not classified as DSD in hospital administration coding systems, as they have their  
303 first presentation in departments other than endocrinology (e.g. urology). Only a fraction is  
304 referred to specialized DSD teams for interdisciplinary care and genetic work-up. Genetic work-

305 up does not yield a genetic diagnosis relating to a DSD in >50% of individuals (34). In a US  
306 single center study among 131 boys with proximal hypospadias, only 60 (46%) received  
307 endocrine and genetic testing and 9 (7%) received a DSD diagnosis (35). In a Chinese single  
308 center study in 165 individuals with proximal hypospadias, only 14 (8%) obtained a DSD  
309 diagnosis (36). Depending on which forms of hypospadias might qualify as DSD, we assume  
310 that we have largely underestimated the prevalence of the subgroup of other 46,XY DSD in our  
311 study. Interestingly, we observed the highest prevalence in the most recent study period from  
312 2015-2019. Increased awareness of DSD among different specialties may have led to more  
313 referrals to pediatric endocrinologists in more recent years, particularly after the Chicago  
314 Consensus Statement. This group may also include individuals who have not yet received a  
315 genetic DSD diagnosis that would allow categorization into the more specific DSD  
316 subcategories.

317  
318 46,XX DSD comprise disorders of gonadal development, androgen excess and other forms.  
319 Most studies describe prevalence for individuals with androgen excess, mostly for CAH. Only  
320 one nation-wide cohort study from Sweden reported data on other forms of 46,XX DSD (33).  
321 They report a prevalence of 3.5-4.7 per 100'000 newborn males for individuals with a 46,XX  
322 karyotype and a male phenotype who mainly presented for fertility concerns and were  
323 diagnosed with DSD. Among their study cohort of 44 individuals, 33 had disorders of gonadal  
324 development and 3 had CAH. Comparison to our data is difficult, because categorization of  
325 46,XX DSD diagnoses differed. In our study, we calculated prevalence for 46,XX DSD based on  
326 newborn girls while they used newborn boys, and we did not collect data on phenotype.  
327 Because our cohort was relatively young, we may have missed individuals with 46,XX DSD who  
328 only come to medical attention later in life due to fertility concerns, leading to an  
329 underestimation of the prevalence in this DSD group. We also assume underreporting of 46,XX  
330 disorders of gonadal development and other 46,XX DSD for the earliest interval from 2000-2004

331 due to the retrospective study design and lack of consensus on diagnostic nomenclature.  
332 Several countries, including Switzerland, published CAH prevalence data from their national  
333 neonatal screening programs. Our prevalence estimates are hard to compare to data from the  
334 Swiss Newborn Screening (<https://www.neoscreening.ch/de>), because they do not distinguish  
335 between girls and boys and they only capture individuals with classic CAH. Our cohort included  
336 individuals with non-classic CAH. Prevalence of all subtypes of CAH in Danish females was  
337 15.1 per 100'000 newborn girls (24), which was comparable to our study with a prevalence of  
338 13.3 per 100'000 newborn girls for 46,XX androgen excess.

339  
340 The limitations of available data illustrate the need for national or international registries for rare  
341 DSD covering the entire population to enable incidence and prevalence estimates based on the  
342 population at risk. Real world numbers are important for discussing controversial topics and  
343 receiving the necessary attention and resources from the community to obtain the best possible  
344 support for individuals with DSD (8, 23). This concerns political, legal and medical affairs as well  
345 as research activities and has been recognized by official bodies in several countries worldwide.  
346 The Swiss National Advisory Commission on Biomedical Ethics (37) and the Swiss Academy of  
347 Medical Sciences have published recommendations in 2012 and 2016 which include the  
348 establishment of population-based registration of DSD. According to international  
349 recommendations, individuals with DSD should be cared for by interdisciplinary DSD teams at  
350 qualified centers (1, 4, 8, 10, 38, 39, 40, 41). In Switzerland, most persons with DSD born  
351 between 2000 and 2019 and followed by a pediatric endocrinologist are cared for in a hospital  
352 setting where interdisciplinary DSD teams are established or with a connection to a DSD team.

353  
354 Sex registration at birth, sex reassignment and gender in later life are topics which are often  
355 discussed controversially by policy makers, medical professionals, patient representatives and  
356 human rights activists because many questions are unsolved. One of the most controversially

357 discussed question is whether medical treatments should be offered to children with atypical  
358 genitalia who cannot consent or whether it should be banned by a legal embargo (4, 9).  
359 Accurate estimations regarding the number of affected individuals and families, supported by  
360 data are lacking, but would help in the discourse. Our study showed that Swiss DSD teams treat  
361 only few individuals with rare forms of DSD for which state-of-the-art workup does not reveal a  
362 clear diagnosis and treatment plan (1, 10).  
363 In a multicenter study from Scotland including individuals with atypical genitalia at birth, sex  
364 registration was only delayed in 1 of 11'097 newborns who had atypical genitalia at birth  
365 suggesting a complex form of DSD requiring extensive diagnostic procedures. In all individuals  
366 sex was registered within the first 2 weeks of life, and in only one individual, sex was reassigned  
367 in the first 3 months of life (23). In our 20-year study period, only 13/543 individuals (2.4 %) had  
368 a gender at last follow-up that differed to the registered sex at birth. This may indicate that sex  
369 registration at birth is mostly fitting. However, data on sex registration was not available in 18  
370 individuals (3.2 %) and we did not record age at last follow up. In addition, our study cohort was  
371 young and gender incongruence might manifest only later in life. Thus, we may have slightly  
372 underestimated the frequency of gender reassignment in DSD.  
373  
374 Only population-based data collections with complete prospective and standardized follow-up  
375 can yield reliable estimates on DSD prevalence, gender reassignment, and other topics such as  
376 treatment satisfaction. To solve open questions on frequencies of hormonal and surgical  
377 treatments in individuals with DSD and whether these treatments align with international  
378 recommendations, data registries need to be tailored and standardized for different DSD  
379 diagnoses. The I-DSD Registry is a rare disease registry which allowed to answer many open  
380 questions in the past (5) and proved to be a valuable tool for our study. It offers additional value  
381 for physicians and researchers to join international studies on specific diagnosis groups.  
382 Particularly in the field of rare diseases, international networking is very important.

383 This is the first population-based study reporting on overall DSD prevalence and prevalence of  
384 subcategories as defined by the Chicago Consensus Classification. Our study, however, is  
385 limited by underestimation of prevalence for individuals with DSD. Our time interval of data  
386 collection was relatively short and very recent (from 2000-2019), leading to a young study  
387 population at time of data collection. Thus, our study did not capture individuals with DSD who  
388 have not yet received a diagnosis. Identification of individuals with DSD was retrospective, thus  
389 we may have missed patients which were not correctly coded as DSD in the administrative  
390 clinical databases or hospital coding systems. Our data collection covered the whole of  
391 Switzerland except for the canton of Ticino. Ticino is a geographically distinct region in the  
392 South of Switzerland, and the only canton where Italian is the official language. It is thus unlikely  
393 that individuals with DSD born and living in Ticino are treated in other cantons. As the Chicago  
394 Consensus Classification was published and implemented in 2006, and the structure of the I-  
395 DSD Registry changed during our study period, classification of DSD might have differed over  
396 time. To avoid misclassification, a designated study team coded all DSD cases into categories  
397 according to the Chicago Consensus Classification based on extracted data. We could not  
398 calculate incidence of DSD, because information on year of diagnosis was missing. We also  
399 could not calculate the external genitalia score (EGS) (42) or the external masculinization score  
400 (EMS) (43), because the core data set used in this study did not include phenotype information.  
401 However, the scope of our study focused on prevalence of DSD according to Chicago  
402 Consensus Classification, and we did not require phenotype information for coding.

403  
404 In summary, we found that individuals with complex forms of DSD were rare and received  
405 treatment from interdisciplinary specialized DSD teams. Our data, similar to other studies,  
406 underestimated prevalence. Systematic prospective data collection is needed to provide robust  
407 estimates on DSD occurrence. Standard guidelines for analyzing prevalence of DSD are lacking  
408 to enable comparison of countries and studies. Such guidelines should include standards on



409 classification of diagnostic groups and a definition of the population at risk for each DSD  
410 diagnostic subgroup.

411

## 412 **Funding**

413 This work was supported by the Swiss Society of Endocrinology and Diabetology (SGED), by  
414 the Boveri Foundation Zürich and by the “Stiftung Kinderinsel”.

415

## 416 **Acknowledgements**

417 We thank the Swiss DSD Cohort Study Group for their support. Members of this groups who  
418 helped in the collection of data are (in alphabetical order): Christine Aebi-Ochsner, Private  
419 Practice for Paediatric Endocrinology, Biel Switzerland; Kanetee Busiah, Department of  
420 Pediatric Endocrinology and Diabetology, CHUV, University Children's Hospital, Lausanne,  
421 Switzerland; Mirjam Dirlwanger, Pediatric Endocrine and Diabetes Unit, Children's University  
422 Hospital Geneva, Geneva, Switzerland; Sylvia Gschwend, Private Practice for Paediatric  
423 Endocrinology, Zug, Switzerland; Melanie Hess, Pediatric Endocrinology and Diabetology,  
424 University Children's Hospital Basel, Basel, Switzerland; Beatrice Kuhlmann, Pediatric  
425 Endocrinology, Cantonal Hospital Aarau, Aarau, Switzerland and Private Practice for Paediatric  
426 Endocrinology, Basel, Switzerland; Dagmar l'Allemand, Department of Endocrinology,  
427 Children's Hospital of Eastern Switzerland, St. Gallen, Switzerland; Mariarosaria Lang,  
428 Paediatric Endocrinology and Diabetology, University Children's Hospital Zurich, Zurich,  
429 Switzerland; Kees Noordam, Centre for Paediatric Endocrinology Zurich (PEZZ), Zurich,  
430 Switzerland; Franziska Phan-Hug, Department of Pediatrics, Hospital Morges, Morges and  
431 Department of Pediatrics, Hospital Wallis, Sion, Switzerland; Ursina Probst, Department of  
432 Pediatrics, Cantonal Hospital Winterthur, Winterthur, Switzerland; Maristella Santi, Department  
433 of Pediatrics, Cantonal Hospital Lucerne, Lucerne, Switzerland; Silvia Schmid, Private Practice  
434 for Paediatric Endocrinology, Dubendorf, Switzerland; Valérie Schwitzgebel, Pediatric Endocrine

435 and Diabetes Unit, Children's University Hospital Geneva, Geneva, Switzerland; Michael  
436 Steigert, Department of Pediatrics, Cantonal Hospital Graubunden, Chur, Switzerland; Gabor  
437 Szinnai, Pediatric Endocrinology and Diabetology, University Children's Hospital Basel, Basel,  
438 Switzerland; Gerald Theintz, Private Practice for Paediatric Endocrinology, Lausanne,  
439 Switzerland.

440

#### 441 **Data Availability Statement**

442 Data of this study are registered in the I-DSD Registry and can be accessed upon request. I-  
443 DSD governance and rules apply, see <https://sdmregistries.org/>.

444

#### 445 **Tables**

446 **Table 1:** Numbers and proportions of DSD cases in Switzerland born between 2000 and 2019,  
447 by sex at birth.

448 **Table 2.** Prevalence, average number of cases per year of children identified with DSD in  
449 Switzerland, born between 2000-2019, by diagnostic group.

450

#### 451 **Figure Legends**

452 **Figure 1:** Patient recruitment and exclusion flow chart.

453 **Figure 2:** Comparison of prevalence of identified DSDs in Switzerland between 2000-2004,  
454 2005-2009, 2010-2014 and 2015-2019, by DSD diagnostic group, according to the Chicago  
455 consensus classification of DSD. Error bars indicate 95% confidence intervals. Abbreviations:  
456 DSD, Differences of Sex Development

457 **Figure 3:** Trends in prevalence of identified DSDs in Switzerland between 2000-2019, by DSD  
458 diagnostic group according to the Chicago consensus classification of DSD. Abbreviations:  
459 DSD, Differences of Sex Development

460 **Figure 4:** Number of DSD diagnoses according to the Chicago consensus classification by type  
461 of treatment center, identified in Switzerland between 2000-2019.

462 Abbreviations: DSD, Differences of Sex Development

463

#### 464 **Supplemental material**

465 **Supplemental Table 1:** Prevalence, average number of cases per year and sex ratio of  
466 children identified with DSD in Switzerland, born between 2000-2019, by diagnostic group and  
467 5-year periods.

468

469

470

471

#### 472 **References**

- 473 1. Cools M, Nordenstrom A, Robeva R, Hall J, Westerveld P, Fluck C, et al. Caring for  
474 individuals with a difference of sex development (DSD): a Consensus Statement. *Nat Rev*  
475 *Endocrinol.* 2018;14(7):415-29.
- 476 2. Hughes IA, Houk C, Ahmed SF, Lee PA, Lawson Wilkins Pediatric Endocrine  
477 Society/European Society for Paediatric Endocrinology Consensus G. Consensus statement on  
478 management of intersex disorders. *J Pediatr Urol.* 2006;2(3):148-62.
- 479 3. Fluck CE, Guran T. Ambiguous Genitalia in the Newborn. In: Feingold KR, Anawalt B,  
480 Blackman MR, Boyce A, Chrousos G, Corpas E, et al., editors. *Endotext.* South Dartmouth  
481 (MA)2000.
- 482 4. Lee PA, Nordenstrom A, Houk CP, Ahmed SF, Auchus R, Baratz A, et al. Global  
483 Disorders of Sex Development Update since 2006: Perceptions, Approach and Care. *Horm Res*  
484 *Paediatr.* 2016;85(3):158-80.
- 485 5. Lucas-Herald AK, Ali SR, McMillan C, Rodie ME, McMillan M, Bryce J, et al. I-DSD: The  
486 First 10 Years. *Horm Res Paediatr.* 2023;96(2):238-46.
- 487 6. Ali SR, Lucas-Herald A, Bryce J, Ahmed SF. The Role of International Databases in  
488 Understanding the Aetiology and Consequences of Differences/Disorders of Sex Development.  
489 *Int J Mol Sci.* 2019;20(18).
- 490 7. Ahmed SF. The I-DSD/I-CAH/I-TS Network Activity Report 2023 2023 [Available from:  
491 chrome-extension://efaidnbmnnnibpcajpcglclefindmkaj/[https://sdmregistries.org/wp-](https://sdmregistries.org/wp-content/uploads/2023/08/I-DSD-Activity-Report-June-2023-v2-27.7.23.pdf)  
492 [content/uploads/2023/08/I-DSD-Activity-Report-June-2023-v2-27.7.23.pdf](https://sdmregistries.org/wp-content/uploads/2023/08/I-DSD-Activity-Report-June-2023-v2-27.7.23.pdf).
- 493 8. Hiort O, Cools M, Springer A, McElreavey K, Greenfield A, Wudy SA, et al. Addressing  
494 gaps in care of people with conditions affecting sex development and maturation. *Nat Rev*  
495 *Endocrinol.* 2019;15(10):615-22.

- 496 9. Cools M, Simmonds M, Elford S, Gorter J, Ahmed SF, D'Alberon F, et al. Response to  
497 the Council of Europe Human Rights Commissioner's Issue Paper on Human Rights and  
498 Intersex People. *Eur Urol.* 2016;70(3):407-9.
- 499 10. Fluck C, Nordenstrom A, Ahmed SF, Ali SR, Berra M, Hall J, et al. Standardised data  
500 collection for clinical follow-up and assessment of outcomes in differences of sex development  
501 (DSD): recommendations from the COST action DSDnet. *Eur J Endocrinol.* 2019;181(5):545-64.
- 502 11. Sax L. How common is intersex? a response to Anne Fausto-Sterling. *J Sex Res.*  
503 2002;39(3):174-8.
- 504 12. Claahsen-van der Grinten HL, Speiser PW, Ahmed SF, Arlt W, Auchus RJ, Falhammar  
505 H, et al. Congenital Adrenal Hyperplasia-Current Insights in Pathophysiology, Diagnostics, and  
506 Management. *Endocr Rev.* 2022;43(1):91-159.
- 507 13. Blackless M, Charuvastra A, Derryck A, Fausto-Sterling A, Lauzanne K, Lee E. How  
508 sexually dimorphic are we? Review and synthesis. *Am J Hum Biol.* 2000;12(2):151-66.
- 509 14. Conway GS. Differences in Sex Development (DSD) and related conditions:  
510 mechanisms, prevalences and changing practice. *Int J Impot Res.* 2023;35(1):46-50.
- 511 15. Ata A, Ozen S, Onay H, Uzun S, Goksen D, Ozkinay F, et al. A large cohort of disorders  
512 of sex development and their genetic characteristics: 6 novel mutations in known genes. *Eur J*  
513 *Med Genet.* 2021;64(3):104154.
- 514 16. De Paula GB, Barros BA, Carpini S, Tincani BJ, Mazzola TN, Sanches Guaragna M, et  
515 al. 408 Cases of Genital Ambiguity Followed by Single Multidisciplinary Team during 23 Years:  
516 Etiologic Diagnosis and Sex of Rearing. *Int J Endocrinol.* 2016;2016:4963574.
- 517 17. Finlayson C, Rosoklija I, Aston CE, Austin P, Bakula D, Baskin L, et al. Baseline  
518 Characteristics of Infants With Atypical Genital Development: Phenotypes, Diagnoses, and Sex  
519 of Rearing. *J Endocr Soc.* 2019;3(1):264-72.
- 520 18. Ganie Y, Aldous C, Balakrishna Y, Wiersma R. Disorders of sex development in children  
521 in KwaZulu-Natal Durban South Africa: 20-year experience in a tertiary centre. *J Pediatr*  
522 *Endocrinol Metab.* 2017;30(1):11-8.
- 523 19. Heeley JM, Hollander AS, Austin PF, Merritt DF, Wesevich VG, Washington University  
524 School of Medicine in St Louis DSDT, et al. Risk association of congenital anomalies in patients  
525 with ambiguous genitalia: A 22-year single-center experience. *J Pediatr Urol.* 2018;14(2):153  
526 e1- e7.
- 527 20. Juniarto AZ, van der Zwan YG, Santosa A, Ariani MD, Eggers S, Hersmus R, et al.  
528 Hormonal evaluation in relation to phenotype and genotype in 286 patients with a disorder of  
529 sex development from Indonesia. *Clin Endocrinol (Oxf).* 2016;85(2):247-57.
- 530 21. Man E, Mushtaq I, Barnicoat A, Carmichael P, Hughes CR, Davies K, et al. A Single-  
531 Center, Observational Study of 607 Children and Young People Presenting With Differences of  
532 Sex Development (DSD). *J Endocr Soc.* 2022;7(1):bvac165.
- 533 22. Manzoor J, Aftab S, Yaqoob M. Ambiguous genitalia: An overview of 7 years experience  
534 at the Children's Hospital & Institute of Child Health, Lahore, Pakistan. *Pak J Med Sci.*  
535 2019;35(1):151-5.
- 536 23. Rodie ME, Ali SR, Jayasena A, Alenazi NR, McMillan M, Cox K, et al. A Nationwide  
537 Study of the Prevalence and Initial Management of Atypical Genitalia in the Newborn in  
538 Scotland. *Sex Dev.* 2022;16(1):11-8.
- 539 24. Berglund A, Ornstrup MJ, Lind-Holst M, Duno M, Baekvad-Hansen M, Juul A, et al.  
540 Epidemiology and diagnostic trends of congenital adrenal hyperplasia in Denmark: a  
541 retrospective, population-based study. *Lancet Reg Health Eur.* 2023;28:100598.
- 542 25. Begaud B, Martin K, Abouelfath A, Tubert-Bitter P, Moore N, Moride Y. An easy to use  
543 method to approximate Poisson confidence limits. *Eur J Epidemiol.* 2005;20(3):213-6.
- 544 26. Kim HJ, Chen HS, Byrne J, Wheeler B, Feuer EJ. Twenty years since Joinpoint 1.0: Two  
545 major enhancements, their justification, and impact. *Stat Med.* 2022;41(16):3102-30.

- 546 27. Ameyaw E, Asafo-Agyei SB, Hughes IA, Zacharin M, Chanoine JP. Incidence of  
547 disorders of sexual development in neonates in Ghana: prospective study. *Arch Dis Child*.  
548 2019;104(7):636-8.
- 549 28. Gravholt CH, Andersen NH, Conway GS, Dekkers OM, Geffner ME, Klein KO, et al.  
550 Clinical practice guidelines for the care of girls and women with Turner syndrome: proceedings  
551 from the 2016 Cincinnati International Turner Syndrome Meeting. *Eur J Endocrinol*.  
552 2017;177(3):G1-G70.
- 553 29. Zitzmann M, Aksglaede L, Corona G, Isidori AM, Juul A, T'Sjoen G, et al. European  
554 academy of andrology guidelines on Klinefelter Syndrome Endorsing Organization: European  
555 Society of Endocrinology. *Andrology*. 2021;9(1):145-67.
- 556 30. Stochholm K, Juul S, Juel K, Naeraa RW, Gravholt CH. Prevalence, incidence,  
557 diagnostic delay, and mortality in Turner syndrome. *J Clin Endocrinol Metab*. 2006;91(10):3897-  
558 902.
- 559 31. Herlihy AS, Halliday JL, Cock ML, McLachlan RI. The prevalence and diagnosis rates of  
560 Klinefelter syndrome: an Australian comparison. *Med J Aust*. 2011;194(1):24-8.
- 561 32. Bojesen A, Juul S, Gravholt CH. Prenatal and postnatal prevalence of Klinefelter  
562 syndrome: a national registry study. *J Clin Endocrinol Metab*. 2003;88(2):622-6.
- 563 33. Berglund A, Johannsen TH, Stochholm K, Viuff MH, Fedder J, Main KM, et al. Incidence,  
564 Prevalence, Diagnostic Delay, and Clinical Presentation of Female 46,XY Disorders of Sex  
565 Development. *J Clin Endocrinol Metab*. 2016;101(12):4532-40.
- 566 34. Audi L, Ahmed SF, Krone N, Cools M, McElreavey K, Holterhus PM, et al. GENETICS IN  
567 ENDOCRINOLOGY: Approaches to molecular genetic diagnosis in the management of  
568 differences/disorders of sex development (DSD): position paper of EU COST Action BM 1303  
569 'DSDnet'. *Eur J Endocrinol*. 2018;179(4):R197-R206.
- 570 35. Johnson EK, Jacobson DL, Finlayson C, Yerkes EB, Goetsch AL, Leeth EA, et al.  
571 Proximal Hypospadias-Isolated Genital Condition or Marker of More? *J Urol*. 2020;204(2):345-  
572 52.
- 573 36. Wong YS, Tam YH, Pang KKY, Yau HC. Incidence and diagnoses of disorders of sex  
574 development in proximal hypospadias. *J Pediatr Surg*. 2018;53(12):2498-501.
- 575 37. Ethics SNAcOB. Variations of sex development. Bern, Switzerland: SAMW; 2012.
- 576 38. Lucas-Herald AK, Rodie ME, Ahmed SF. Update on the management of a newborn with  
577 a suspected difference of sex development. *Arch Dis Child*. 2021.
- 578 39. Lucas-Herald AK, Scougall K, Ahmed SF. Delivery of multidisciplinary care in the field of  
579 differences and disorders of sex development (DSD). *Expert Rev Endocrinol Metab*.  
580 2022;17(3):225-34.
- 581 40. Wisniewski AB, Batista RL, Costa EMF, Finlayson C, Sircili MHP, Denes FT, et al.  
582 Management of 46,XY Differences/Disorders of Sex Development (DSD) Throughout Life.  
583 *Endocr Rev*. 2019;40(6):1547-72.
- 584 41. Bever YV, Bruggenwirth HT, Wolffenbuttel KP, Dessens AB, Groenenberg IAL, Knapen  
585 M, et al. Under-reported aspects of diagnosis and treatment addressed in the Dutch-Flemish  
586 guideline for comprehensive diagnostics in disorders/differences of sex development. *J Med  
587 Genet*. 2020;57(9):581-9.
- 588 42. van der Straaten S, Springer A, Zecic A, Hebenstreit D, Tonnhofer U, Gawlik A, et al.  
589 The External Genitalia Score (EGS): A European Multicenter Validation Study. *J Clin Endocrinol  
590 Metab*. 2020;105(3).
- 591 43. Ahmed SF, Khwaja O, Hughes IA. The role of a clinical score in the assessment of  
592 ambiguous genitalia. *BJU Int*. 2000;85(1):120-4.

**Table 1: Numbers and proportions of DSD cases in Switzerland born between 2000 and 2019, by sex at birth**

|                                                  | Total |     | Sex at birth |     |       |     |                        |     |
|--------------------------------------------------|-------|-----|--------------|-----|-------|-----|------------------------|-----|
|                                                  |       |     | Female       |     | Male  |     | Other/<br>Not assigned |     |
|                                                  | N=561 |     | N=301        |     | N=242 |     | N=18                   |     |
|                                                  | n     | %   | n            | %   | n     | %   | n                      | %   |
| <b>Period of birth</b>                           |       |     |              |     |       |     |                        |     |
| 2000-2004                                        | 146   | 26  | 83           | 28  | 61    | 25  | 2                      | 11  |
| 2005-2009                                        | 160   | 28  | 92           | 31  | 60    | 25  | 8                      | 44  |
| 2010-2014                                        | 136   | 24  | 78           | 26  | 54    | 22  | 4                      | 22  |
| 2015-2019                                        | 119   | 21  | 48           | 16  | 67    | 28  | 4                      | 22  |
| <b>Sex chromosome DSD</b>                        | 266   | 100 | 171          | 100 | 95    | 100 | 0                      | n/a |
| Klinefelter syndrome and variants                | 74    | 28  | 0            | 0   | 74    | 78  | 0                      | n/a |
| Turner syndrome and variants                     | 149   | 56  | 148          | 87  | 1     | 1   | 0                      | n/a |
| 45,X/46,XY and variants                          | 33    | 12  | 22           | 13  | 11    | 12  | 0                      | n/a |
| Other                                            | 10    | 4   | 1            | 1   | 9     | 9   | 0                      | n/a |
| <b>46,XY DSD</b>                                 | 177   | 100 | 28           | 100 | 135   | 100 | 14                     | 100 |
| <i>Disorders of gonadal development</i>          | 28    | 16  | 9            | 32  | 17    | 13  | 2                      | 14  |
| Complete or partial gonadal dysgenesis           | 16    |     | 8            |     | 7     |     | 1                      |     |
| Gonadal regression                               | 9     |     | 0            |     | 9     |     | 0                      |     |
| Ovotesticular DSD                                | 3     |     | 1            |     | 1     |     | 1                      |     |
| <i>Disorders in androgen synthesis or action</i> | 37    | 21  | 18           | 64  | 18    | 13  | 1                      | 7   |
| Disorders of androgen synthesis                  | 12    |     | 2            |     | 9     |     | 1                      |     |
| Disorders of androgen action                     | 19    |     | 16           |     | 3     |     | 0                      |     |
| Disorders of AMH or AMH receptor                 | 6     |     | 0            |     | 6     |     | 0                      |     |
| <i>Other</i>                                     | 112   | 63  | 1            | 4   | 100   | 74  | 11                     | 79  |
| Complex genital anomalies                        | 106   |     | 1            |     | 95    |     | 10                     |     |
| Cloacal anomalies                                | 2     |     | 0            |     | 1     |     | 1                      |     |
| Other                                            | 4     |     | 0            |     | 4     |     | 0                      |     |
| <b>46,XX DSD</b>                                 | 118   | 100 | 102          | 100 | 12    | 100 | 4                      | 100 |
| <i>Disorders of gonadal development</i>          | 8     | 7   | 2            | 2   | 6     | 50  | 0                      | 0   |
| Gonadal dysgenesis                               | 2     |     | 2            |     | 0     |     | 0                      |     |
| Ovotesticular DSD                                | 2     |     | 0            |     | 2     |     | 0                      |     |
| Testicular DSD                                   | 4     |     | 0            |     | 4     |     | 0                      |     |
| <i>Androgen excess</i>                           | 99    | 84  | 89           | 87  | 6     | 50  | 4                      | 100 |
| Fetal                                            | 97    |     | 87           |     | 6     |     | 4                      |     |
| Fetoplacental                                    | 2     |     | 2            |     | 0     |     | 0                      |     |
| Maternal                                         | 0     |     | 0            |     | 0     |     | 0                      |     |
| <i>Other</i>                                     | 11    | 9   | 11           | 11  | 0     | 0   | 0                      | 0   |
| Cloacal anomalies                                | 7     |     | 7            |     | 0     |     | 0                      |     |
| Other                                            | 4     |     | 4            |     | 0     |     | 0                      |     |
| <b>Gender at last follow-up</b>                  |       |     |              |     |       |     |                        |     |
| Female                                           | 304   | 54  | 294          | 52  | 5     | 1   | 5                      | 1   |
| Male                                             | 256   | 46  | 6            | 1   | 237   | 42  | 13                     | 2   |
| Both                                             | 1     | 0.2 | 1            | 0.2 | 0     | 0   | 0                      | 0   |

Abbreviations: AMH, Anti-Mullerian hormone; DSD, differences of sex development; n/a, not applicable.

**Table 2**

Prevalence, average number of cases per year of individuals identified with DSD in Switzerland, born between 2000-2019, by diagnostic group.

|                                                        | Average number of cases/year | Prevalence per 100.000 newborns per year (95% CI) | 1:N newborns |
|--------------------------------------------------------|------------------------------|---------------------------------------------------|--------------|
| <i>All DSD diagnoses<sup>a</sup></i>                   | 28.1                         | 36.6 (33.6; 39.7)                                 | 2735         |
| <i>DSD diagnostic group</i>                            |                              |                                                   |              |
| Sex chromosome DSD <sup>a</sup>                        | 13.3                         | 17.3 (15.3; 19.5)                                 | 5768         |
| 46,XY DSD <sup>a</sup>                                 | 8.9                          | 11.5 (9.9; 13.4)                                  | 8669         |
| 46,XX DSD <sup>a</sup>                                 | 5.9                          | 7.7 (6.4; 9.2)                                    | 13003        |
| <i>Sex chromosome DSD</i>                              |                              |                                                   |              |
| Klinefelter syndrome and variants <sup>b</sup>         | 3.7                          | 9.4 (7.4; 11.8)                                   | 10660        |
| Turner syndrome and variants <sup>c</sup>              | 7.5                          | 20.0 (16.9; 23.5)                                 | 5004         |
| 45,X/46,XY and variants <sup>a</sup>                   | 1.7                          | 2.2 (1.5; 3.0)                                    | 46496        |
| Other <sup>a</sup>                                     | 0.5                          | 0.7 (0.3; 1.2)                                    | 153437       |
| <i>46,XY DSD</i>                                       |                              |                                                   |              |
| Disorders of gonadal development <sup>b</sup>          | 1.4                          | 3.5 (2.4; 5.1)                                    | 28172        |
| Disorders in androgen synthesis or action <sup>b</sup> | 1.9                          | 4.7 (3.3; 6.5)                                    | 21319        |
| Other <sup>b</sup>                                     | 5.6                          | 14.2 (11.7; 17.1)                                 | 7043         |
| <i>46,XX DSD</i>                                       |                              |                                                   |              |
| Disorders of gonadal development <sup>c</sup>          | 0.4                          | 1.1 (0.5; 2.1)                                    | 93195        |
| Androgen excess <sup>c</sup>                           | 5.0                          | 13.3 (10.8; 16.2)                                 | 7531         |
| Other <sup>c</sup>                                     | 0.6                          | 1.5 (0.7; 2.6)                                    | 67778        |

Abbreviations: CI, confidence interval; DSD, differences of sex development.

Footnotes:

<sup>a</sup>Prevalence calculated based on newborns of both sexes.

<sup>b</sup>Prevalence calculated based on newborn boys.

<sup>c</sup>Prevalence calculated based on newborn girls.

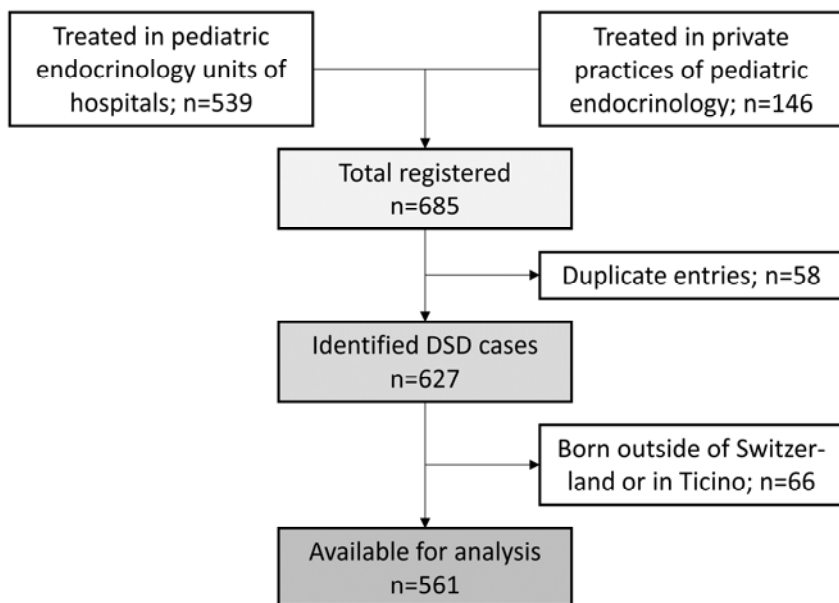

**Figure 1: Identification of the Swiss DSD cohort.** Study participants were identified through pediatric endocrinology departments in pediatric hospitals and private practices specialized in endocrine care.



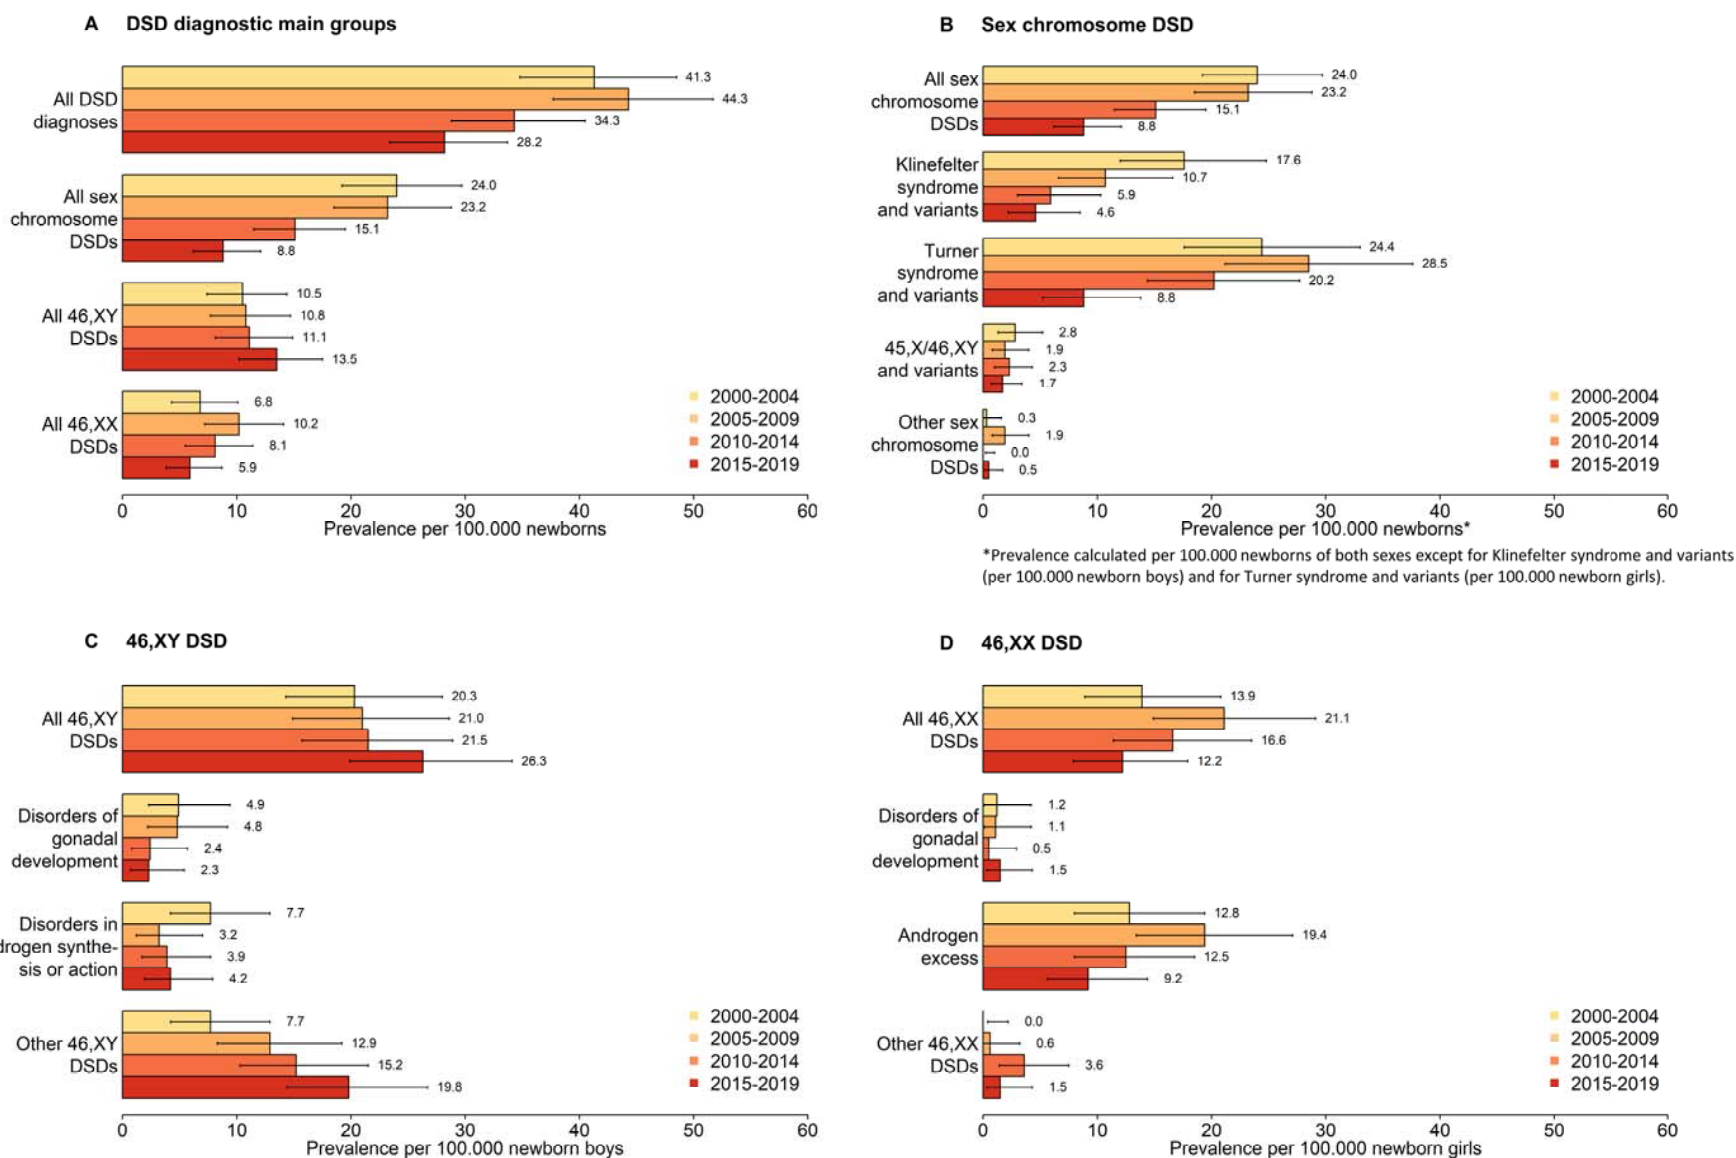

**Figure 2:** Comparison of prevalence of identified individuals with DSD in Switzerland between 2000-2004, 2005-2009, 2010-2014 and 2015-2019, by DSD diagnostic group, according to the Chicago Consensus Classification. Error bars indicate 95% confidence intervals. Abbreviations: DSD, differences of sex development.

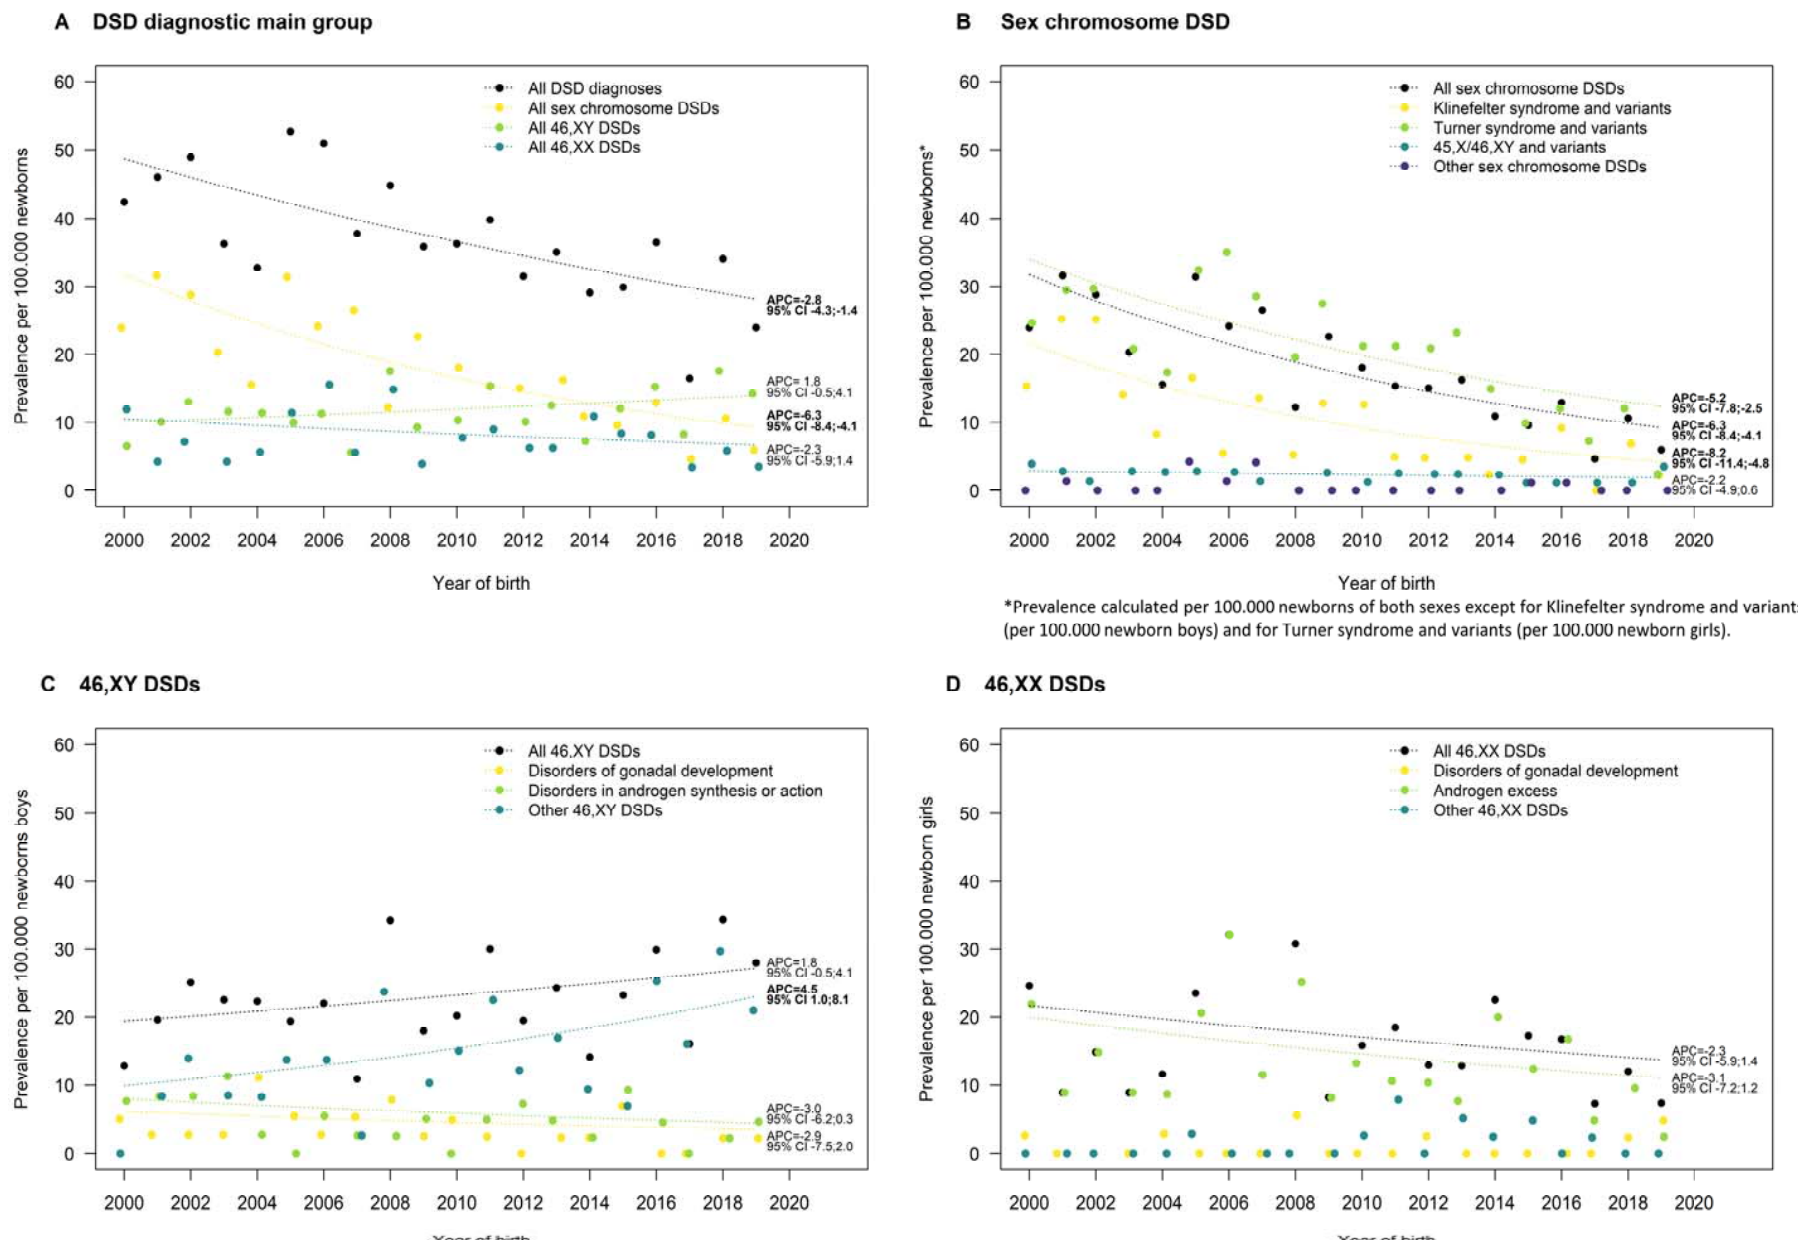

**Figure 3:** Trends in prevalence of identified DSDs in Switzerland between 2000-2019, by DSD diagnostic group according to the Chicago Consensus Classification. We used JoinPoint regression to analyze the annual percentage change (APC) in prevalence over time. We did not model APC in diagnostic groups where there were no cases in >3 calendar years. Bold letters indicate p-values <0.5. Abbreviations: APC, Annual Percent Change; DSD, differences of sex development.

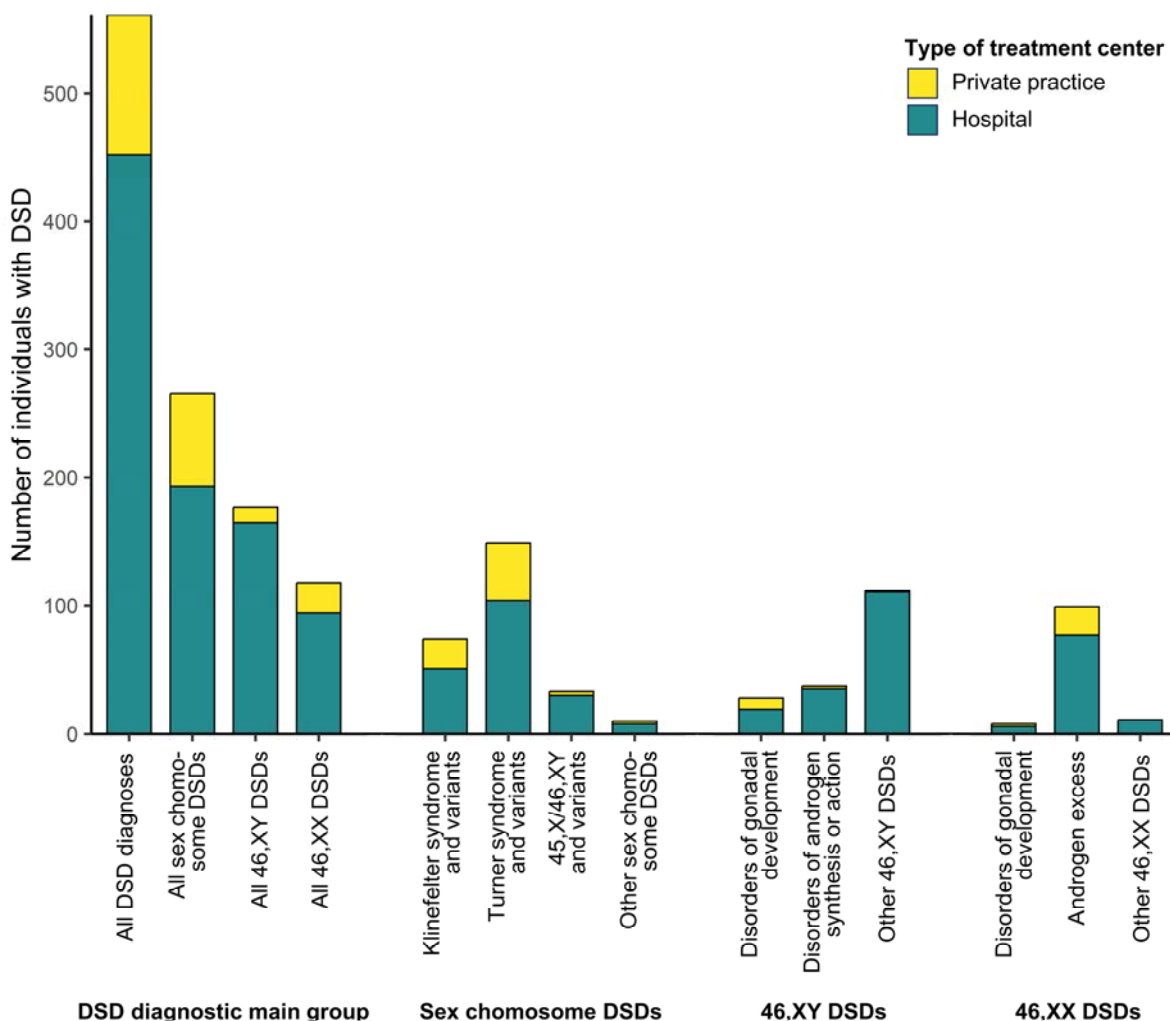

**Figure 4:** Number of individuals with DSD according to the Chicago Consensus Classification by type of treatment center, identified in Switzerland between 2000-2019. Abbreviations: DSD, differences of sex development.
